# Supplementary material for: Reduce Manual Curation by Combining Gene Predictions from Multiple Annotation Engines, a Case Study of Start Codon Prediction
Source: PLOS journal article supplement (doi:10.1371/journal.pone.0063523), 2013-05-10

**Figure S4. Percentage ORFs incorrect when AGEs have a consensus start codon coordinate prediction.**

The error-rates for consensus start codon coordinate prediction for four AGEs (Table 1) and of various combinations of these four AGEs are plotted for the four reference organisms. Error-rates were calculated as discussed in materials and methods. A: BASys; B: ISGA; C: RAST and D: xBASE.

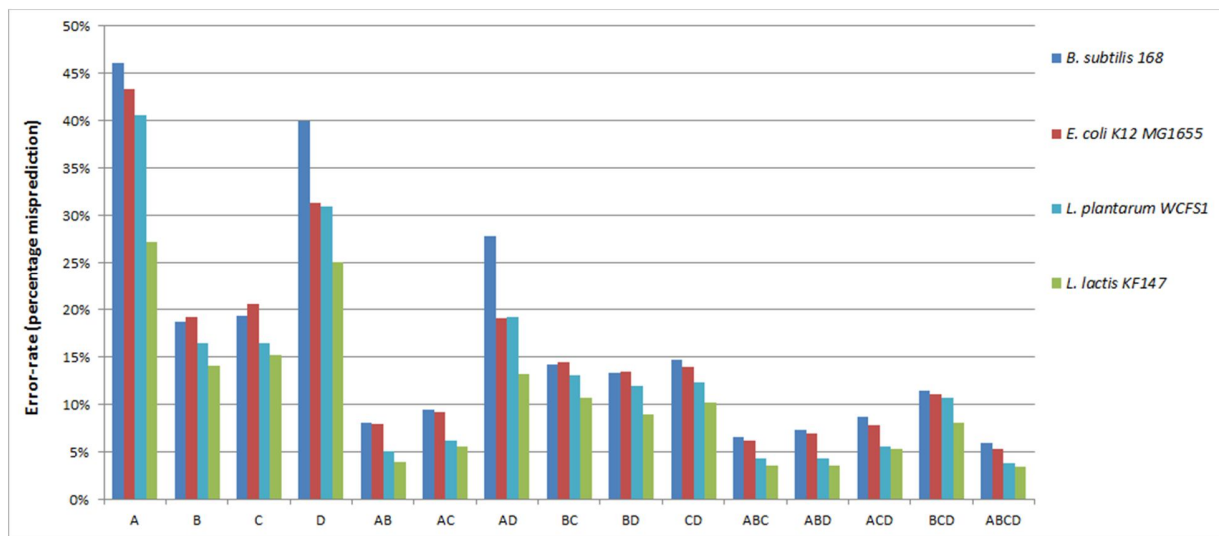

Supplement: S4 (10.1371/journal.pone.0063523.s004) [file journal.pone.0063523.s004]
